# Supplementary material for: Influence of Small Quantities of Water on the Physical Properties of Alkylammonium Nitrate Ionic Liquids
Source: MDPI journal article supplement (doi:10.3390/ijms22147334), 2021-07-08
Supplement: s1 [file s1]

## **SUPPORTING MATERIALS**

**Table S1.** Experimental densities ( $\rho$ ) of EAN and PAN at different temperatures as function of water content (w).

| Ionic liquid | w (ppm) | $\rho$ (g·cm <sup>-3</sup> ) |        |        |        |        |        |        |        |        |        |        |        |        |        |        |        |        |        |        |
|--------------|---------|------------------------------|--------|--------|--------|--------|--------|--------|--------|--------|--------|--------|--------|--------|--------|--------|--------|--------|--------|--------|
|              |         | T (°C)                       |        |        |        |        |        |        |        |        |        |        |        |        |        |        |        |        |        |        |
|              |         | 5                            | 10     | 15     | 20     | 25     | 30     | 35     | 40     | 45     | 50     | 55     | 60     | 65     | 70     | 75     | 80     | 85     | 90     | 95     |
| EAN          | 1140    | 1.2232                       | 1.2201 | 1.2169 | 1.2138 | 1.2106 | 1.2076 | 1.2045 | 1.2014 | 1.1984 | 1.1955 | 1.1925 | 1.1896 | 1.1867 | 1.1838 | 1.1809 | 1.1781 | 1.1753 | 1.1725 | 1.1696 |
|              | 1320    | 1.2233                       | 1.2201 | 1.2169 | 1.2138 | 1.2106 | 1.2075 | 1.2045 | 1.2014 | 1.1984 | 1.1954 | 1.1925 | 1.1896 | 1.1865 | 1.1836 | 1.1808 | 1.1780 | 1.1752 | 1.1724 | 1.1697 |
|              | 1760    | 1.2231                       | 1.2199 | 1.2168 | 1.2136 | 1.2105 | 1.2074 | 1.2043 | 1.2013 | 1.1983 | 1.1953 | 1.1923 | 1.1894 | 1.1865 | 1.1836 | 1.1808 | 1.1779 | 1.1751 | 1.1723 | 1.1694 |
|              | 2110    |                              |        |        | 1.2137 | 1.2105 | 1.2074 | 1.2044 | 1.2013 | 1.1983 | 1.1953 | 1.1924 | 1.1894 | 1.1865 | 1.1836 | 1.1808 | 1.1779 | 1.1751 | 1.1723 | 1.1695 |
|              | 2120    | 1.2231                       | 1.2199 | 1.2167 |        |        |        |        |        |        |        |        |        |        |        |        |        |        |        |        |
|              | 2490    | 1.2231                       | 1.2199 | 1.2167 | 1.2136 | 1.2104 | 1.2073 | 1.2042 | 1.2012 | 1.1982 | 1.1952 | 1.1923 | 1.1893 | 1.1865 | 1.1837 | 1.1809 | 1.1780 | 1.1752 | 1.1723 | 1.1694 |
|              | 2930    | 1.2230                       | 1.2198 | 1.2166 | 1.2134 | 1.2103 | 1.2072 | 1.2041 | 1.2011 | 1.1981 | 1.1951 | 1.1921 | 1.1892 | 1.1863 | 1.1834 | 1.1807 | 1.1779 | 1.1750 | 1.1722 | 1.1693 |
|              | 3660    | 1.2229                       | 1.2197 | 1.2165 | 1.2134 | 1.2102 | 1.2071 | 1.2040 | 1.2010 | 1.1980 | 1.1950 | 1.1920 | 1.1891 | 1.1862 | 1.1833 | 1.1804 | 1.1776 | 1.1748 | 1.1719 | 1.1691 |
|              | 4580    | 1.2228                       | 1.2196 | 1.2164 | 1.2133 | 1.2101 | 1.2070 | 1.2040 | 1.2009 | 1.1979 | 1.1949 | 1.1920 | 1.1890 | 1.1861 | 1.1832 | 1.1803 | 1.1775 | 1.1747 | 1.1718 | 1.1689 |
|              | 5290    | 1.2227                       | 1.2195 | 1.2163 | 1.2132 | 1.2100 | 1.2069 | 1.2038 | 1.2008 | 1.1978 | 1.1948 | 1.1918 | 1.1889 | 1.1860 | 1.1831 | 1.1802 | 1.1774 | 1.1746 | 1.1717 | 1.1689 |
|              | 11790   | 1.2217                       | 1.2185 | 1.2153 | 1.2122 | 1.2090 | 1.2059 | 1.2028 | 1.1997 | 1.1967 | 1.1937 | 1.1907 | 1.1878 | 1.1848 | 1.1819 | 1.1790 | 1.1762 | 1.1733 | 1.1704 | 1.1675 |
|              | 16070   | 1.2211                       | 1.2179 | 1.2147 | 1.2115 | 1.2083 | 1.2052 | 1.2021 | 1.1990 | 1.1960 | 1.1929 | 1.1900 | 1.1870 | 1.1840 | 1.1811 | 1.1782 | 1.1753 | 1.1725 | 1.1696 | 1.1667 |
| PAN          | 1300    | 1.1639                       | 1.1607 | 1.1576 | 1.1546 | 1.1515 | 1.1485 | 1.1455 | 1.1425 | 1.1396 | 1.1366 | 1.1337 | 1.1308 |        |        |        |        |        |        |        |
|              | 1430    | 1.1638                       | 1.1607 | 1.1576 | 1.1545 | 1.1514 | 1.1484 | 1.1454 | 1.1424 | 1.1394 | 1.1365 | 1.1336 | 1.1307 | 1.1278 | 1.1249 | 1.1220 | 1.1191 | 1.1163 | 1.1135 | 1.1105 |
|              | 6240    | 1.1635                       | 1.1603 | 1.1572 | 1.1541 | 1.1511 | 1.1480 | 1.1450 | 1.1420 | 1.1390 | 1.1360 | 1.1331 | 1.1302 | 1.1273 | 1.1244 | 1.1215 | 1.1186 | 1.1157 | 1.1128 | 1.1098 |
|              | 9890    | 1.1632                       | 1.1601 | 1.1570 | 1.1538 | 1.1508 | 1.1477 | 1.1447 | 1.1416 | 1.1387 | 1.1357 | 1.1327 | 1.1298 | 1.1269 | 1.1240 | 1.1211 | 1.1182 | 1.1153 | 1.1124 | 1.1094 |
|              | 15460   | 1.1628                       | 1.1597 | 1.1565 | 1.1534 | 1.1503 | 1.1472 | 1.1442 | 1.1411 | 1.1381 | 1.1351 | 1.1322 | 1.1292 | 1.1263 | 1.1234 | 1.1205 | 1.1176 | 1.1147 | 1.1117 | 1.1087 |
|              | 20580   | 1.1626                       | 1.1595 | 1.1563 | 1.1532 | 1.1501 | 1.1470 | 1.1440 | 1.1409 | 1.1379 | 1.1349 | 1.1319 | 1.1289 | 1.1259 | 1.1230 | 1.1200 | 1.1171 | 1.1142 | 1.1113 | 1.1084 |
|              | 23990   | 1.1623                       | 1.1591 | 1.1560 | 1.1528 | 1.1497 | 1.1466 | 1.1435 | 1.1405 | 1.1374 | 1.1344 | 1.1314 | 1.1284 | 1.1255 | 1.1225 | 1.1196 | 1.1167 | 1.1138 | 1.1109 | 1.1079 |
|              | 29190   | 1.1620                       | 1.1588 | 1.1556 | 1.1525 | 1.1493 | 1.1462 | 1.1431 | 1.1401 | 1.1370 | 1.1340 | 1.1309 | 1.1279 | 1.1250 | 1.1220 | 1.1190 | 1.1161 | 1.1131 | 1.1102 | 1.1073 |

**Table S2.** Experimental viscosities ( $\eta$ ) of EAN and PAN at different temperatures as function of water content (w).

| Ionic liquid | w (ppm) | $\eta$ (mPa·s) |       |       |      |      |       |       |       |       |       |       |       |       |       |       |       |       |       |       |
|--------------|---------|----------------|-------|-------|------|------|-------|-------|-------|-------|-------|-------|-------|-------|-------|-------|-------|-------|-------|-------|
|              |         | T (°C)         |       |       |      |      |       |       |       |       |       |       |       |       |       |       |       |       |       |       |
|              |         | 5              | 10    | 15    | 20   | 25   | 30    | 35    | 40    | 45    | 50    | 55    | 60    | 65    | 70    | 75    | 80    | 85    | 90    | 95    |
| EAN          | 660     | 85.7           | 68.8  | 55.9  | 46.0 | 38.4 | 32.4  | 27.7  | 23.85 |       |       |       |       |       |       |       |       |       |       |       |
|              | 1480    | 84.5           | 67.5  | 54.9  | 45.2 | 37.8 | 31.9  | 27.3  | 23.53 | 20.48 | 17.96 | 15.87 | 14.12 | 12.64 | 11.38 | 10.30 | 9.36  | 8.55  | 7.84  | 7.22  |
|              | 1680    | 83.8           | 67.4  | 54.8  | 45.2 | 37.8 | 31.9  | 27.3  | 23.54 | 20.48 | 17.96 | 15.87 | 14.12 | 12.64 | 11.37 | 10.29 | 9.36  | 8.55  | 7.84  | 7.22  |
|              | 1760    | 83.8           | 67.4  | 54.8  | 45.2 | 37.7 | 31.9  | 27.3  | 23.52 | 20.47 | 17.95 | 15.86 | 14.11 | 12.63 | 11.37 | 10.29 | 9.35  | 8.54  | 7.84  | 7.22  |
|              | 2110    |                | 66.6  | 54.1  | 44.7 | 37.4 | 31.6  | 27.0  | 23.31 | 20.29 | 17.80 | 15.74 | 14.00 | 12.54 | 11.29 | 10.22 | 9.29  | 8.48  | 7.78  | 7.17  |
|              | 3660    | 80.6           | 64.6  | 52.6  | 43.4 | 36.3 | 30.8  | 26.3  | 22.72 | 19.80 | 17.38 | 15.38 | 13.69 | 12.26 | 11.05 | 10.01 | 9.10  | 8.32  | 7.64  | 7.03  |
|              | 4580    | 78.8           | 63.5  | 51.8  | 42.8 | 35.8 | 30.3  | 25.9  | 22.41 | 19.54 | 17.16 | 15.19 | 13.53 | 12.12 | 10.93 | 9.89  | 9.01  | 8.23  | 7.56  | 6.97  |
|              | 5290    | 78.0           | 62.7  | 51.1  | 42.3 | 35.4 | 30.0  | 25.7  | 22.24 | 19.40 | 17.05 | 15.08 | 13.44 | 12.05 | 10.86 | 9.84  | 8.96  | 8.19  | 7.52  | 6.93  |
|              | 11790   | 67.6           | 54.7  | 44.8  | 37.3 | 31.4 | 26.7  | 22.95 | 19.91 | 17.42 | 15.36 | 13.64 | 12.19 | 10.96 | 9.90  | 8.99  | 8.21  | 7.52  | 6.92  | 6.39  |
|              | 16070   | 61.9           | 50.2  | 41.3  | 34.4 | 29.1 | 24.82 | 21.40 | 18.61 | 16.32 | 14.42 | 12.83 | 11.49 | 10.34 | 9.36  | 8.52  | 7.79  | 7.15  | 6.58  | 6.08  |
| PAN          | 370     | 200.5          | 153.1 | 119.2 | 94.4 | 76.1 | 62.1  | 51.4  | 43.1  | 36.4  | 31.2  | 26.9  | 23.39 | 20.50 | 18.09 | 16.05 | 14.34 | 12.88 | 11.63 | 10.54 |
|              | 870     | 198.6          | 151.5 | 118.2 | 93.8 | 75.5 | 61.7  | 51.1  | 42.9  | 36.3  | 31.0  | 26.8  | 23.29 | 20.41 | 18.01 | 15.99 | 14.28 | 12.81 | 11.55 | 10.46 |
|              | 1300    | 194.5          | 148.6 | 115.8 | 91.9 | 74.1 | 60.5  | 50.1  | 41.9  | 35.4  | 30.3  | 26.0  | 22.56 |       |       |       |       |       |       |       |
|              | 1430    | 193.1          | 147.5 | 114.9 | 91.1 | 73.4 | 60.0  | 49.7  | 41.7  | 35.3  | 30.2  | 26.1  | 22.75 | 19.97 | 17.65 | 15.70 | 14.05 | 12.64 | 11.43 | 10.38 |
|              | 1600    | 191.9          | 146.6 | 114.2 | 90.6 | 73.0 | 59.7  | 49.5  | 41.5  | 35.2  | 30.1  | 26.0  | 22.65 | 19.88 | 17.58 | 15.64 | 13.99 | 12.59 | 11.39 | 10.35 |
|              | 3890    | 179.1          | 137.3 | 107.3 | 85.4 | 69.0 | 56.5  | 46.9  | 39.4  | 33.5  | 28.7  | 24.86 | 21.70 | 19.08 | 16.89 | 15.04 | 13.48 | 12.14 | 11.01 | 10.01 |
|              | 6240    | 167.3          | 128.7 | 100.9 | 80.4 | 65.2 | 53.6  | 44.6  | 37.5  | 31.9  | 27.4  | 23.76 | 20.76 | 18.28 | 16.21 | 14.47 | 12.98 | 11.70 | 10.60 | 9.65  |
|              | 9890    | 150.3          | 116.2 | 91.5  | 73.3 | 59.6 | 49.1  | 41.0  | 34.6  | 29.6  | 25.5  | 22.14 | 19.41 | 17.13 | 15.23 | 13.62 | 12.25 | 11.07 | 10.05 | 9.17  |
|              | 15460   | 130.7          | 101.7 | 80.5  | 64.8 | 53.0 | 43.9  | 36.8  | 31.2  | 26.7  | 23.12 | 20.16 | 17.71 | 15.67 | 13.96 | 12.52 | 11.28 | 10.22 | 9.30  | 8.50  |
|              | 20580   | 115.1          | 90.0  | 71.6  | 57.9 | 47.6 | 39.6  | 33.3  | 28.4  | 24.37 | 21.14 | 18.48 | 16.28 | 14.46 | 12.91 | 11.60 | 10.48 | 9.51  | 8.67  | 7.94  |
|              | 23990   | 106.1          | 83.2  | 66.5  | 53.9 | 44.4 | 37.0  | 31.3  | 26.7  | 22.96 | 19.96 | 17.48 | 15.44 | 13.73 | 12.27 | 11.04 | 9.99  | 9.08  | 8.29  | 7.59  |
|              | 29190   | 93.1           | 73.4  | 59.0  | 48.1 | 39.7 | 33.3  | 28.2  | 24.14 | 20.87 | 18.19 | 15.98 | 14.16 | 12.61 | 11.31 | 10.21 | 9.25  | 8.42  | 7.71  | 7.08  |

**Table S3.** Experimental electrical conductivities ( $\kappa$ ) of EAN and PAN at different temperatures as function of water content ( $w$ ).

| Ionic liquid | $w$ (ppm) | $\kappa$ (mS·cm <sup>-1</sup> ) |       |       |       |       |       |      |      |      |      |
|--------------|-----------|---------------------------------|-------|-------|-------|-------|-------|------|------|------|------|
|              |           | T (°C)                          |       |       |       |       |       |      |      |      |      |
|              |           | 5                               | 15    | 25    | 35    | 45    | 55    | 65   | 75   | 85   | 95   |
| EAN          | 580       | 10.70                           | 15.24 | 20.6  | 27.2  | 33.9  | 41.2  | 48.4 | 56.3 | 64.9 | 73.1 |
|              | 1020      | 10.70                           | 15.27 | 20.7  | 27.4  | 34.3  | 41.6  | 49.3 | 57.0 | 65.3 | 74.2 |
|              | 1320      |                                 |       | 20.9  |       |       |       |      |      |      |      |
|              | 1620      | 10.92                           | 15.57 | 21.0  | 27.7  | 34.7  | 41.9  | 49.8 | 57.3 | 65.7 | 74.4 |
|              | 1640      | 10.86                           | 15.52 | 21.1  | 27.9  | 34.6  | 41.9  | 49.6 | 57.5 | 65.6 | 74.1 |
|              | 2120      |                                 |       | 21.2  |       |       |       |      |      |      |      |
|              | 2530      |                                 |       | 21.3  |       |       |       |      |      |      |      |
|              | 2930      |                                 |       | 21.4  |       |       |       |      |      |      |      |
|              | 3660      |                                 |       | 21.7  |       |       |       |      |      |      |      |
|              | 4540      | 11.44                           | 16.30 | 22.0  | 28.9  | 36.0  | 43.8  | 51.8 | 59.8 | 68.5 | 76.8 |
|              | 5310      | 11.64                           | 16.49 | 22.2  | 29.2  | 36.3  | 43.8  | 51.8 | 59.8 | 68.1 | 76.8 |
|              | 11750     | 12.87                           | 18.08 | 24.3  | 31.6  | 39.0  | 47.0  | 55.4 | 64.0 | 72.7 | 81.7 |
|              | 16170     | 13.78                           | 19.25 | 26.1  | 33.3  | 41.1  | 49.4  | 57.9 | 66.7 | 75.5 | 84.4 |
| PAN          | 310       | 3.54                            | 5.58  | 8.19  | 11.39 | 15.18 | 19.55 | 24.4 | 29.9 | 35.5 | 41.7 |
|              | 1630      | 3.69                            | 5.77  | 8.42  | 11.76 | 15.54 | 19.93 | 24.8 | 30.5 | 36.1 | 42.2 |
|              | 3350      | 3.86                            | 6.02  | 8.78  | 12.18 | 16.11 | 20.6  | 25.5 | 31.4 | 37.0 | 43.0 |
|              | 5050      | 4.01                            | 6.23  | 9.04  | 12.51 | 16.52 | 21.0  | 26.5 | 32.0 | 37.6 | 43.9 |
|              | 6540      | 4.19                            | 6.48  | 9.38  | 12.87 | 16.99 | 21.7  | 27.3 | 32.6 | 38.4 | 44.7 |
|              | 10570     | 4.59                            | 7.05  | 10.11 | 13.90 | 18.20 | 23.0  | 28.8 | 34.4 | 40.3 | 46.7 |
|              | 16430     | 5.17                            | 7.83  | 11.12 | 15.09 | 19.64 | 24.7  | 30.5 | 36.5 | 42.4 | 48.8 |
|              | 21340     | 5.80                            | 8.68  | 12.23 | 16.47 | 21.2  | 27.0  | 32.6 | 38.9 | 44.8 | 51.3 |

**Table S4.** Experimental refractive indexes ( $n_D$ ) and surface tensions ( $\sigma$ ) of EAN and PAN at 25 °C as function of water content (w).

| Ionic liquid | w (ppm) | $n_D$   | w (ppm) | $\sigma$ (mN·m <sup>-1</sup> ) |
|--------------|---------|---------|---------|--------------------------------|
|              | 25 °C   |         |         |                                |
| EAN          | 660     | 1.45394 | 740     | 47.76                          |
|              | 1140    | 1.45388 | 900     | 47.77                          |
|              | 1480    | 1.45383 | 1680    | 47.79                          |
|              | 1740    | 1.45383 | 1740    | 47.80                          |
|              | 2110    | 1.45381 | 1760    | 47.79                          |
|              | 2120    | 1.45384 | 1940    | 47.79                          |
|              | 2530    | 1.45382 | 2110    | 47.78                          |
|              | 2930    | 1.45380 | 3660    | 47.83                          |
|              | 4580    | 1.45367 | 5290    | 47.87                          |
|              | 5290    | 1.45360 | 16070   | 48.08                          |
|              | 11790   | 1.45290 | 16550   | 48.08                          |
|              | 16070   | 1.45236 |         |                                |
| PAN          | 370     | 1.45535 | 370     | 38.70                          |
|              | 870     | 1.45523 | 1300    | 38.76                          |
|              | 1600    | 1.45519 | 1430    | 38.73                          |
|              | 1620    | 1.45511 | 1600    | 38.77                          |
|              | 2560    | 1.45508 | 1620    | 38.77                          |
|              | 3560    | 1.45500 | 2560    | 38.79                          |
|              | 3890    | 1.45489 | 3560    | 38.78                          |
|              | 5080    | 1.45486 | 3890    | 38.82                          |
|              | 6240    | 1.45468 | 5080    | 38.81                          |
|              | 6550    | 1.45472 | 6240    | 38.84                          |
|              | 9890    | 1.45426 | 9890    | 38.93                          |
|              | 10820   | 1.45425 | 13230   | 39.03                          |
|              | 15460   | 1.45368 | 15460   | 39.04                          |
|              | 16730   | 1.45351 | 20580   | 39.16                          |
|              | 20580   | 1.45313 | 22370   | 39.22                          |
|              | 22370   | 1.45288 | 29190   | 39.36                          |
|              | 23990   | 1.45283 |         |                                |
|              | 29190   | 1.45220 |         |                                |

Table S5 compiles in detail the properties studied at any temperature in each bibliographic reference. From this review, it can be deduced that previously published data show a wide dispersion in all the properties studied, and that a significant number of papers do not present accurate information on the water content of pure ILs.

**Table S5.** Compilation of published experimental densities ( $\rho$ ), viscosities ( $\eta$ ), electrical conductivities ( $\kappa$ ), refractive indexes ( $n_D$ ) and surface tensions ( $\sigma$ ) of EAN and PAN.

| REFERENCES                                                                                                                                                                                                                                                                                                                                   | EAN                             | PAN    |
|----------------------------------------------------------------------------------------------------------------------------------------------------------------------------------------------------------------------------------------------------------------------------------------------------------------------------------------------|---------------------------------|--------|
| S1. Allen, M.; Evans, D. F.; Lumry, R. Thermodynamic properties of the ethylammonium nitrate + water system: Partial molar volumes, heat capacities, and expansivities. <i>J. Sol. Chem.</i> <b>1985</b> , <i>14</i> , 549-560.                                                                                                              | $\rho$                          |        |
| S2. Anaredy, R. S.; Lucio, A. J.; Shaw, S. K. Adventitious Water Sorption in a Hydrophilic and a Hydrophobic Ionic Liquid: Analysis and Implications. <i>ACS Omega</i> <b>2016</b> , <i>1</i> , 407-416.                                                                                                                                     | $\rho$ $\eta$                   |        |
| S3. Angell, C.A.; Xu, W.; Belieres, J.; Yoshizawa, M. Ionic liquids and ionic liquid acids with high temperature stability for fuel cell and other high temperature applications, method of making and cell employing same. US Patent US 7,867,658 B2, filed 3 May 2004 and issued 11 January 2011                                           | $\rho$ $\eta$ $\kappa$          |        |
| S4. Anouti, M.; Caillon-Caravanier, M.; Dridi, Y.; Galiano, H.; Lemordant, D. Synthesis and Characterization of New Pyrrolidinium Based Protic Ionic Liquids. Good and Superionic Liquids. <i>J. Phys. Chem. B</i> <b>2008</b> , <i>112</i> , 13335-13343.                                                                                   | $\kappa$                        |        |
| S5. Atkin, R.; Warr, G. G. Structure in Confined Room-Temperature Ionic Liquids. <i>J. Phys. Chem. C</i> <b>2007</b> , <i>111</i> , 5162-5168.                                                                                                                                                                                               | $\rho$                          | $\rho$ |
| S6. Atkin, R.; Warr, G. G. The Smallest Amphiphiles: Nanostructure in Protic Room-Temperature Ionic Liquids with Short Alkyl Groups. <i>J. Phys. Chem. B</i> <b>2008</b> , <i>112</i> , 4164-4166.                                                                                                                                           | $\rho$                          | $\rho$ |
| S7. Atkin, R.; Warr, G. G. Bulk and Interfacial Nanostructure in Protic Room Temperature Ionic Liquids. In <i>Ionic Liquids: From Knowledge to Application</i> ; Plechkova, N. V., Rogers, R. D., Seddon, K. R.; <i>American Chemical Society</i> : Washington DC, USA, <b>2009</b> ; <i>ACS Symposium Series Volume 1030</i> , pp. 317-333. | $\rho$                          | $\rho$ |
| S8. Barycki, M.; Sosnowska, A.; Gajewicz, A.; Bobrowski, M.; Wileńska, D.; Skurski, P.; Gieldoń, A.; Czaplewski, C.; Uhl, S.; Laux, E.; Journot, T.; Jeandupeux, L.; Keppner, H.; Puzyn, T. Temperature-dependent structure-property modeling of viscosity for ionic liquids. <i>Fluid Phase Equilib.</i> <b>2016</b> , <i>427</i> , 9- 17.  | $\rho$ $\eta$                   |        |
| S9. Belieres, J.; Gervasio, D.; Angell, A. Binary inorganic salt mixtures as high conductivity liquid electrolytes for >100 °C fuel cells. <i>Chem. Commun.</i> <b>2006</b> , 4799-4801.                                                                                                                                                     | $\kappa$                        |        |
| S10. Benhlila, N.; Turmine, M.; Letellier, P.; Naejus, R.; Lemordant, D. Étude électrochimique du nitrate d'éthylammonium fondu à 298 K : établissement d'une échelle de potentiel redox. <i>J. Chim. Phys.</i> <b>1998</b> , <i>95</i> , 25-44.                                                                                             | $\rho$ $\eta$ $\kappa$ $\sigma$ |        |

|                                                                                                                                                                                                                                                                                                                             |                                       |                                       |
|-----------------------------------------------------------------------------------------------------------------------------------------------------------------------------------------------------------------------------------------------------------------------------------------------------------------------------|---------------------------------------|---------------------------------------|
| S11. Berthod, A; Ruiz-Ángel, M. J.; Carda-Broch, S. Ionic liquids in separation techniques. <i>J. Chromatogr. A</i> <b>2008</b> , 1184, 6-18.                                                                                                                                                                               | $\rho$ $\eta$ $n_D$                   | $\rho$ $\eta$ $n_D$                   |
| S12. Bonetti, M.; Oleinikova, A.; Bervillier, C. Coexistence Curve of the Ionic Binary Mixture Ethylammonium Nitrate-n-Octanol: Critical Properties. <i>J. Phys. Chem. B</i> <b>1997</b> , 101, 2164-2173.                                                                                                                  | $n_D$                                 |                                       |
| S13. Campetella, M.; Mariani, A.; Sadun, C.; Wu, E.; Castner, E. W.; Gontrani, L. Structure and dynamics of propylammonium nitrate-acetonitrile mixtures: An intricate multi-scale system probed with experimental and theoretical techniques. <i>J. Chem. Phys.</i> <b>2018</b> , 148, 134507.                             |                                       | $\eta$                                |
| S14. Canongia Lopes, J. N.; Esperança, J. M. S. S.; Mão de Ferro, A.; Pereiro, A. B.; Plechkova, N. V.; Rebelo, L. P. N.; Seddon, K. R.; Vázquez-Fernández, I. Protic Ammonium Nitrate Ionic Liquids and Their Mixtures: Insights into Their Thermophysical Behavior. <i>J. Phys. Chem. B</i> <b>2016</b> , 120, 2397–2406. | $\rho$ $\eta$ $\kappa$                | $\rho$ $\eta$ $\kappa$                |
| S15. Capelo, S. B.; Méndez-Morales, T.; Carrete, J.; López Lago, E.; Vila, J.; Cabeza, O.; Rodríguez, J. R.; Turmine, M.; Varela, L. M. Effect of Temperature and Cationic Chain Length on the Physical Properties of Ammonium Nitrate-Based Protic Ionic Liquids. <i>J. Phys. Chem. B</i> <b>2012</b> , 116, 11302-11312.  | $\rho$ $\eta$ $\kappa$ $\sigma$ $n_D$ | $\rho$ $\eta$ $\kappa$ $\sigma$ $n_D$ |
| S16. Chagnes, A.; Tougui, A.; Carré, B.; Ranganathan, N.; Lemordant, D. Abnormal Temperature Dependence of the Viscosity of Ethylammonium Nitrate–Methanol Ionic Mixtures. <i>J. Sol. Chem.</i> <b>2004</b> , 33, 247-255.                                                                                                  | $\eta$                                |                                       |
| S17. Evans, D. F.; Yamauchi, A.; Roman, R.; Casassa, E. Z. Micelle Formation in Ethylammonium Nitrate, a Low-Melting Fused Salt. <i>J. Colloid Interface Sci.</i> <b>1982</b> , 88, 89-96.                                                                                                                                  | $\eta$ $\sigma$                       |                                       |
| S18. Evans, D. F.; Yamauchi, A.; Wei, G. J.; Bloomfield, V. A. Micelle Size in Ethylammonium Nitrate As Determined by Classical and Quasi-Elastic Light Scattering. <i>J. Phys. Chem.</i> <b>1983</b> , 87, 3537–3541.                                                                                                      | $\eta$ $\sigma$ $n_D$                 |                                       |
| S19. Frost, D. S.; Ngan, M.; Dai, L. L. Spontaneous Transport of Microparticles across Liquid–Liquid Interfaces. <i>Langmuir</i> <b>2013</b> , 29, 9310–9315.                                                                                                                                                               | $\rho$ $\eta$                         |                                       |
| S20. Frost, D. S.; Machas, M.; Perea, B.; Dai, L. L. Nonconvective Mixing of Miscible Ionic Liquids. <i>Langmuir</i> <b>2013</b> , 29, 10159–10165.                                                                                                                                                                         | $\eta$ $n_D$                          |                                       |
| S21. Greaves, T. L.; Weerawardena, A.; Fong, C.; Krodziewska, I.; Drummond, C. J. Protic Ionic Liquids: Solvents with Tunable Phase Behavior and Physicochemical Properties. <i>J. Phys. Chem. B</i> <b>2006</b> , 110, 22479-22487.                                                                                        | $\rho$ $\eta$ $\kappa$ $\sigma$ $n_D$ |                                       |
| S22. Greaves, T. L.; Weerawardena, A.; Fong, C.; Drummond, C. J. Formation of Amphiphile Self-Assembly Phases in Protic Ionic Liquids. <i>J. Phys. Chem. B</i> <b>2007</b> , 111, 4082-4088.                                                                                                                                | $\eta$ $\sigma$                       |                                       |
| S23. Greaves, T. L.; Drummond, J. Protic Ionic Liquids: Properties and Applications. <i>Chem. Rev.</i> <b>2008</b> , 108, 206-237.                                                                                                                                                                                          | $\rho$ $\eta$ $\sigma$ $n_D$          | $\rho$ $\eta$ $\sigma$ $n_D$          |
| S24. Greaves, T. L.; Mudie, S. T.; Drummond, C. J. Effect of protic ionic liquids (PILs) on the formation of non-ionic dodecyl poly(ethylene                                                                                                                                                                                | $\sigma$                              |                                       |

|                                                                                                                                                                                                                                                                                                                                                                            |                        |       |
|----------------------------------------------------------------------------------------------------------------------------------------------------------------------------------------------------------------------------------------------------------------------------------------------------------------------------------------------------------------------------|------------------------|-------|
| oxide) surfactant self-assembly structures and the effect of these surfactants on the nanostructure of PILs. <i>Phys. Chem. Chem. Phys.</i> <b>2011</b> , 13, 20441-20452.                                                                                                                                                                                                 |                        |       |
| S25. Hadded, M.; Biquard, M.; Letellier, P.; Schaal, R. Propriétés volumiques du nitrate d'éthylammonium fondu à 298 K et de ses mélanges avec l'eau. <i>Can. J. Chem.</i> <b>1985</b> , 63, 565-570.                                                                                                                                                                      | $\rho$                 |       |
| S26. Hadded, M.; Bahri, H.; Letellier, P. Tensions superficielles des mélanges binaires EAU-Nitrate d'éthylammonium à 298 K. <i>J. Chim. Phys.</i> <b>1986</b> , 83, 419-426.                                                                                                                                                                                              | $\sigma$               |       |
| S27. Hadded, M.; Mayaffre, A.; Letellier, P.; Tensions superficielles des Sol.s idéales: Application aux solvants binaires constitués de méthanol et de nitrate d'éthylammonium fondu à 298 K. <i>J. Chim. Phys.</i> <b>1989</b> , 86, 525-537.                                                                                                                            | $\rho$ $\sigma$        |       |
| S28. Hjalmarsson, N.; Atkin, R.; Rutland, M. W. Effect of Lithium Ions on Rheology and Interfacial Forces in Ethylammonium Nitrate and Ethanolammonium Nitrate. <i>J. Phys. Chem. C</i> <b>2016</b> , 120, 26960–26967.                                                                                                                                                    | $\eta$                 |       |
| S29. Hjalmarsson, N.; Atkin, R.; Rutland, M. W. Is the boundary layer of an ionic liquid equally lubricating at higher temperature?. <i>Phys. Chem. Chem. Phys.</i> <b>2016</b> , 18, 9232-9239.                                                                                                                                                                           | $\eta$                 |       |
| S30. Kaneko, K.; Yoshimura, Y.; Shimizu, A. Water concentration dependence of the refractive index of various ionic liquid-water mixtures. <i>J. Mol. Liq.</i> <b>2018</b> , 250, 283- 286.                                                                                                                                                                                | $n_D$                  | $n_D$ |
| S31. Kanzaki, R.; Uchida, K.; Song, X.; Umebayashi, Y.; Ishiguro, S. Acidity and Basicity of Aqueous Mixtures of a Protic Ionic Liquid, Ethylammonium Nitrate. <i>Anal. Sci.</i> <b>2008</b> , 24, 1347-1349.                                                                                                                                                              | $\rho$                 |       |
| S32. Krueger, M.; Bründermann, E.; Funkner, S.; Weingärtner, H.; Havenith, M. Communications: Polarity fluctuations of the protic ionic liquid ethylammonium nitrate in the terahertz regime. <i>J. Chem. Phys.</i> <b>2010</b> , 132, 101101.                                                                                                                             | $\kappa$               |       |
| S33. Kundu, N.; Roy, A.; Dutta, R.; Sarkar, N. Translational and Rotational Diffusion of Two Differently Charged Solutes in Ethylammonium Nitrate–Methanol Mixture: Does the Nanostructure of the Amphiphiles Influence the Motion of the Solute?. <i>J. Phys. Chem. B</i> <b>2016</b> , 120, 5481–5490.                                                                   | $\eta$                 |       |
| S34. López-Barrón, C. R.; Wagner, N. J. Structural Transitions of CTAB Micelles in a Protic Ionic Liquid. <i>Langmuir</i> <b>2012</b> , 28, 12722–12730.                                                                                                                                                                                                                   | $\rho$ $\eta$ $\kappa$ |       |
| S35. Malham, I. B.; Letellier, P.; Mayaffre, A.; Turmine, M. Part I: Thermodynamic analysis of volumetric properties of concentrated aqueous Sol.s of 1-butyl-3-methylimidazolium tetrafluoro borate, 1-butyl-2,3-dimethylimidazolium tetrafluoroborate, and ethylammonium nitrate based on pseudo-lattice theory. <i>J. Chem. Thermodyn.</i> <b>2007</b> , 39, 1132-1143. | $\rho$                 |       |
| S36. Mariani, A.; Russina, O., Caminiti, R.; Triolo, A. Structural organization in a methanol:ethylammonium nitrate (1 :4) mixture: A joint X-ray /Neutron diffraction and computational study. <i>J. Mol. Liq.</i> <b>2015</b> , 212, 947-956.                                                                                                                            | $\rho$                 |       |



|                                                                                                                                                                                                                                                                                            |                        |                       |
|--------------------------------------------------------------------------------------------------------------------------------------------------------------------------------------------------------------------------------------------------------------------------------------------|------------------------|-----------------------|
| S37. Mariani, A.; Caminiti, R.; Ramondo, F.; Salvitti, G.; Mocci, F.; Gontrani, L. Inhomogeneity in Ethylammonium Nitrate–Acetonitrile Binary Mixtures: The Highest “Low q Excess” Reported to Date. <i>J. Phys. Chem. Lett.</i> <b>2017</b> , <i>8</i> , 3512–3522.                       | $\rho$                 |                       |
| S38. Mariani, A.; Bonomo, M.; Wu, B.; Centrella, B.; Dini, D.; Castner Jr., E. W.; Gontrani, L. Intriguing transport dynamics of ethylammonium nitrate–acetonitrile binary mixtures arising from nano-inhomogeneity. <i>Phys. Chem. Chem. Phys.</i> <b>2017</b> , <i>19</i> , 27212–27220. | $\eta$ $\kappa$        |                       |
| S39. Méndez-Morales, T.; Carrete, J.; Cabeza, O.; Russina, O.; Triolo, A.; Gallego, L. J.; and Varela, L. M. Solvation of Lithium Salts in Protic Ionic Liquids: A Molecular Dynamics Study. <i>J. Phys. Chem. B</i> <b>2014</b> , <i>118</i> , 761–770.                                   | $\rho$                 |                       |
| S40. Moore, L. J.; Summers, M. D.; Ritchie, A. D. Optical trapping and spectroscopic characterisation of ionic liquid Sol.s. <i>Phys. Chem. Chem. Phys.</i> <b>2013</b> , <i>15</i> , 13489–13498.                                                                                         | $n_D$                  |                       |
| S41. Oleinikova, A.; Bonetti, M. Critical Behavior of the Electrical Conductivity of Concentrated Electrolytes: Ethylammonium Nitrate in n-Octanol Binary Mixture. <i>J. Sol. Chem.</i> <b>2002</b> , <i>31</i> , 397–413.                                                                 | $\eta$ $\kappa$        |                       |
| S42. Perlt, E.; Ray, P.; Hansen, A.; Malberg, F.; Grimme, S.; Kirchner, B. Finding the best density functional approximation to describe interaction energies and structures of ionic liquids in molecular dynamics studies. <i>J. Chem. Phys.</i> <b>2018</b> , <i>148</i> , 193835.      | $\rho$                 |                       |
| S43. Perron, G.; Hardy, A.; Justice, J.-C.; Desnoyers, J. E. Model System for Concentrated Electrolyte Sol.s: Thermodynamic and Transport Properties of Ethylammonium Nitrate in Acetonitrile and in Water. <i>J. Sol. Chem.</i> <b>1993</b> , <i>22</i> , 1159–1178.                      | $\rho$ $\eta$ $\kappa$ |                       |
| S44. Poole, C. F.; Kersten, B. R.; Ho, S. S.; Coddens, M. E.; Furton, K. G. Organic Salts, Liquid at Room Temperature, as Mobile Phases in Liquid Chromatography. <i>J. Chromatogr. A</i> <b>1986</b> , <i>352</i> , 407–425.                                                              | $\rho$ $\eta$ $n_D$    | $\rho$ $\eta$ $n_D$   |
| S45. Poole, C. F. Chromatographic and spectroscopic methods for the determination of solvent properties of room temperature ionic liquids. <i>J. Chromatogr. A</i> <b>2004</b> , <i>1037</i> , 49–82.                                                                                      | $\rho$ $\eta$ $n_D$    | $\rho$ $\eta$ $n_D$   |
| S46. Porcedda, S.; Marongiu, B.; Schirru, M.; Falconieri, D.; Piras, A. Excess enthalpy and excess volume for binary systems of two ionic liquids + water. <i>J. Therm. Anal. Calorim.</i> <b>2011</b> , <i>103</i> , 29–33.                                                               | $\rho$                 | $\rho$                |
| S47. Prabhu, S. R.; Dutt, G. B. Does Addition of an Electrolyte Influence the Rotational Diffusion of Nondipolar Solutes in a Protic Ionic Liquid?. <i>J. Phys. Chem. B</i> <b>2015</b> , <i>119</i> , 6311–6316.                                                                          | $\eta$                 |                       |
| S48. Ridings, C.; Warr, G. G.; Andersson, G. G. Surface Ordering in Binary Mixtures of Protic Ionic Liquids. <i>J. Phys. Chem. Lett.</i> <b>2017</b> , <i>8</i> , 4264–4267.                                                                                                               | $\sigma$               | $\sigma$              |
| S49. Russina, O.; Mariani, A.; Caminiti, R.; Triolo, A. Structure of a Binary Mixture of Ethylammonium Nitrate and Methanol. <i>J. Sol. Chem.</i> <b>2015</b> , <i>44</i> , 669–685.                                                                                                       | $\rho$                 |                       |
| S50. Segade, L.; Cabanas, M.; Domínguez-Pérez, M.; Rilo, E.; García-Garabal, S.; Turmine, M.; Varela, L. M.; Gómez-González, V.; Docampo-                                                                                                                                                  | $\rho$ $\sigma$ $n_D$  | $\rho$ $\sigma$ $n_D$ |

|                                                                                                                                                                                                                                                                                                                                                                                    |                        |                     |
|------------------------------------------------------------------------------------------------------------------------------------------------------------------------------------------------------------------------------------------------------------------------------------------------------------------------------------------------------------------------------------|------------------------|---------------------|
| Álvarez, B.; Cabeza, O. Surface and bulk characterisation of mixtures containing alkylammonium nitrates and water or ethanol: Experimental and simulated properties at 298.15 K. <i>J. Mol. Liq.</i> <b>2016</b> , <i>222</i> , 663-670.                                                                                                                                           |                        |                     |
| S51. Shetty, P. H.; Youngberg, P. J.; Kersen, B. R.; Poole, C. F. Solvent properties of liquid organic salts used as mobile phases in microcolumn reversed-phase liquid chromatography. <i>J. Chromatogr. A</i> <b>1987</b> , <i>411</i> , 61-79.                                                                                                                                  | $\rho$ $\eta$ $n_D$    | $\rho$ $\eta$ $n_D$ |
| S52. Shotwell, J. B.; Flowers II, R. A. Electrochemical Investigation of the Solvolytic Properties of Ethylammonium Nitrate (EAN) and Propylammonium Nitrate (PAN). <i>Electroanalysis</i> <b>2000</b> , <i>12</i> , 223-226.                                                                                                                                                      | $\eta$                 | $\eta$              |
| S53. Smith, J. A.; Webber, G. B.; Warr, G. G.; Atkin, R. Rheology of Protic Ionic Liquids and Their Mixtures. <i>J. Phys. Chem. B</i> <b>2013</b> , <i>117</i> , 13930-13935.                                                                                                                                                                                                      | $\rho$ $\eta$ $n_D$    | $\rho$ $\eta$ $n_D$ |
| S54. Smith, J. A.; Webber, G. B.; Warr, G. G.; Zimmer, A.; Atkin, R.; Werzer, O. Shear dependent viscosity of poly( ethylene oxide) in two protic ionic liquids. <i>J. Colloid Interface Sci.</i> <b>2014</b> , <i>430</i> , 56-60.                                                                                                                                                | $\rho$ $\eta$          | $\rho$ $\eta$       |
| S55. Song, X.; Hamano, H.; Minofar, B.; Kanzaki, R.; Fujii, K.; Kameda, Y.; Kohara, S.; Watanabe, M.; Ishiguro, S.; Umebayashi, Y. Structural Heterogeneity and Unique Distorted Hydrogen Bonding in Primary Ammonium Nitrate Ionic Liquids Studied by High-Energy X-ray Diffraction Experiments and MD Simulations. <i>J. Phys. Chem. B</i> <b>2012</b> , <i>116</i> , 2801-2813. | $\rho$                 | $\rho$              |
| S56. Sonnleitner, T.; Nikitina, V.; Nazet, A.; Buchner, R. Do H-bonds explain strong ion aggregation in ethylammonium nitrate + acetonitrile mixtures?. <i>Phys. Chem. Chem. Phys.</i> <b>2013</b> , <i>15</i> , 18445-18452.                                                                                                                                                      | $\rho$ $\eta$ $\kappa$ |                     |
| S57. Sonnleitner, T.; Turton, D. A.; Hefter, G.; Ortner, A.; Waselikowski, S.; Walther, M.; Wynne, K.; Buchner, R. Ultra-Broadband Dielectric and Optical Kerr-Effect Study of the Ionic Liquids Ethyl and Propylammonium Nitrate. <i>J. Phys. Chem. B</i> <b>2015</b> , <i>119</i> , 8826-8841.                                                                                   | $\rho$ $\eta$ $\kappa$ | $\rho$ $\eta$       |
| S58. Sugden, S.; Wilkins, H. CLXVII.—The parachor and chemical constitution. Part XII. Fused metals and salts. <i>J. Chem. Soc.</i> <b>1929</b> , 1291-1298.                                                                                                                                                                                                                       | $\rho$ $\sigma$        |                     |
| S59. Thater, J. C.; Gérard, V.; Stubenrauch, C. Microemulsions with the Ionic Liquid Ethylammonium Nitrate: Phase Behavior, Composition, and Microstructure. <i>Langmuir</i> <b>2014</b> , <i>30</i> , 8283-8289.                                                                                                                                                                  | $\rho$                 |                     |
| S60. Turton, D. A.; Sonnleitner, T.; Ortner, A.; Walther, M.; Hefter, G.; Seddon, K. R.; Stana, S.; Plechkova, N. V.; Buchner, R.; Wynne, K. Structure and dynamics in protic ionic liquids: A combined optical Kerr-effect and dielectric relaxation spectroscopy study. <i>Faraday Discuss.</i> <b>2012</b> , <i>154</i> , 145-153.                                              | $\eta$                 |                     |
| S61. Usula, M.; Matteoli, E.; Leonelli, F.; Mocci, F.; Marincola, F. C.; Gontrani, L.; Porcedda, S. Thermo-physical properties of ammonium-based ionic liquid + N-methyl-2-pyrrolidone mixtures at 298.15 K. <i>Fluid Phase Equilib.</i> <b>2014</b> , <i>383</i> , 49-54.                                                                                                         | $\rho$                 | $\rho$              |

|                                                                                                                                                                                                                                                                                                                                                                                               |                              |        |
|-----------------------------------------------------------------------------------------------------------------------------------------------------------------------------------------------------------------------------------------------------------------------------------------------------------------------------------------------------------------------------------------------|------------------------------|--------|
| S62. Wakeham, D.; Nelson, A.; Warr, G. G.; Atkin, R. Probing the protic ionic liquid surface using X-ray reflectivity. <i>Phys. Chem. Chem. Phys.</i> <b>2011</b> , <i>13</i> , 20828–20835.                                                                                                                                                                                                  | $\rho$                       | $\rho$ |
| S63. Wakeham, D.; Eschebach, D.; Webber, G. B.; Atkin, R.; Warr, G. G. Surface Composition of Mixtures of Ethylammonium Nitrate, Ethanolammonium Nitrate, and Water. <i>Aust. J. Chem.</i> <b>2012</b> , <i>65</i> , 1554–1556.                                                                                                                                                               | $\sigma$                     |        |
| S64. Weingärtner, H.; Merkel, T.; Käshammer, S.; Schröer, W.; Wiegand, S. The Effect of Short-Range Hydrogen-Bonded Interactions on the Nature of the Critical Point of Ionic Fluids. Part I: General Properties of the New System Ethylammonium Nitrate+n-Octanol with an Upper Consolute Point Near Room Temperature. <i>Ber. Bunsenges. Phys. Chem.</i> <b>1993</b> , <i>97</i> , 970-975. | $\kappa$                     |        |
| S65. Weingärtner, H.; Knocks, A.; Schrader, W.; Kaatz, U. Dielectric Spectroscopy of the Room Temperature Molten Salt Ethylammonium Nitrate. <i>J. Phys. Chem. A</i> <b>2001</b> , <i>105</i> , 8646-8650.                                                                                                                                                                                    | $\rho$ $\eta$ $\kappa$ $n_D$ |        |
| S66. Yalcin, D.; Drummond, C. J.; Greaves, T. L. High throughput approach to investigating ternary solvents of aqueous non-stoichiometric protic ionic liquids. <i>Phys. Chem. Chem. Phys.</i> <b>2019</b> , <i>21</i> , 6810-6827.                                                                                                                                                           | $\rho$ $\sigma$              |        |
| S67. Zarrougui, R.; Dhahbi, M.; Lemordant, D. Volumetric Properties of Ethylammonium Nitrate + $\gamma$ -Butyrolactone Binary Systems: Solvation Phenomena from Density and Raman Spectroscopy. <i>J. Sol. Chem.</i> <b>2010</b> , <i>39</i> , 1531–1548.                                                                                                                                     | $\rho$                       |        |
| S68. Zarrougui, R.; Dhahbi, M.; Lemordant, D. Electrochemical behaviour of iodine redox couples in aprotic and protic RTILs: 1-Butyl-1-methylpyrrolidinium bis(trifluoromethanesulfonyl)imide and ethylammonium nitrate. <i>J. Electroanal. Chem.</i> <b>2014</b> , <i>717-718</i> , 189 – 195.                                                                                               | $\eta$ $\kappa$              |        |
| S69. Zarrougui, R.; Dhahbi, M.; Lemordant, D. Transport and Thermodynamic Properties of Ethylammonium Nitrate–Water Binary Mixtures: Effect of Temperature and Composition. <i>J. Sol. Chem.</i> <b>2015</b> , <i>44</i> , 686-702.                                                                                                                                                           | $\rho$ $\eta$ $\kappa$       |        |

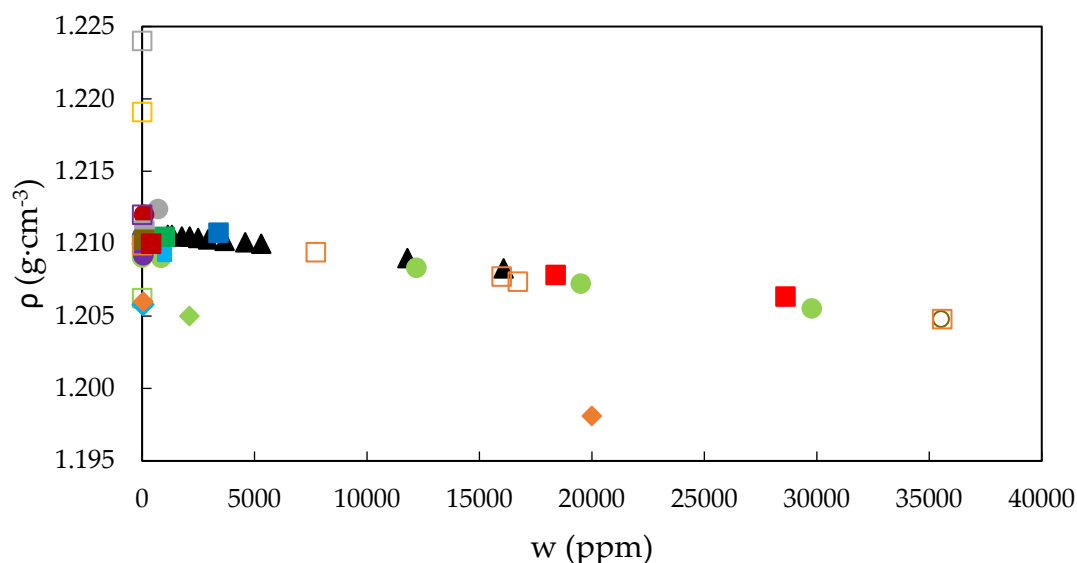

**Figure S1.** Density experimental data ( $\rho$ ) of EAN at 25 °C of the present work (black solid triangles) and a compilation of that published near water content studied ( $w$ ), with accurate measure of water content (solid) or not (open): [S1] (green dots), [S2] (yellow dots), [S5] (orange dots), [S6] (cyan dots), [S7] (red dots), [S10] (pink dots), [S14] (grey dots), [S19] (dark green dots), [S25] (brown dots), [S27] (blue dots), [S31] (dark red dots), [S37] (purple dots), [S39] (green squares), [S44] (yellow squares), [S46] (orange squares), [S49] (cyan squares), [S50] (red squares), [S51] (pink squares), [S55] (grey squares), [S56] (dark green squares), [S57] (brown squares), [S61] (blue squares), [S62] (dark red squares), [S65] (purple squares), [S66] (green rombs), [S67] (cyan rombs) and [S69] (orange rombs).

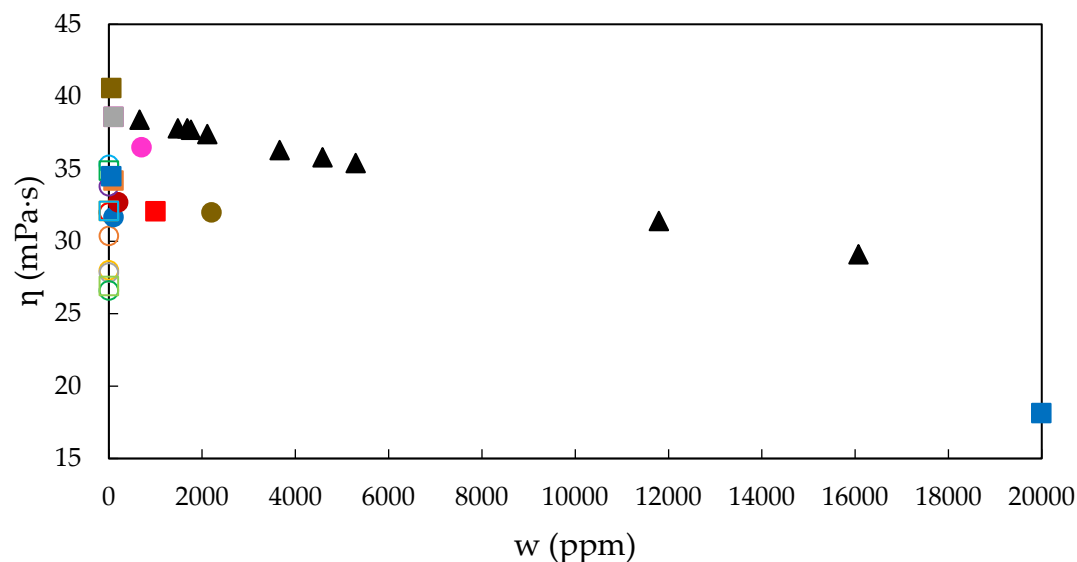

**Figure S2.** Viscosity experimental data ( $\eta$ ) of EAN at 25 °C of the present work (black solid triangles) and a compilation of that published near water content studied ( $w$ ), with accurate measure of water content (solid) or not (open): [S2] (green dots), [S3] (yellow dots), [S8] (orange dots), [S10] (cyan dots), [S11] (red dots), [S14] (pink dots), [S15] (grey dots), [S18] (dark green dots), [S22] (brown dots), [S33] (blue dots), [S38] (dark red dots), [S43] (purple dots), [S44] (green squares), [S45] (yellow squares), [S47] (orange squares), [S51] (cyan squares), [S53] (red squares), [S56] (pink squares), [S57] (grey squares), [S65] (dark green squares), [S68] (brown squares) and [S69] (blue squares).

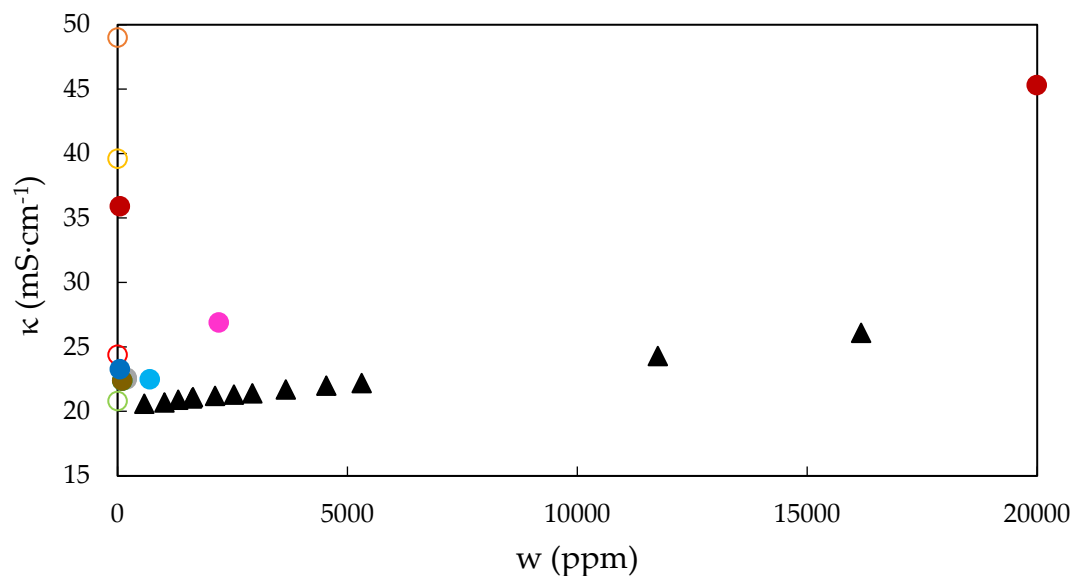

**Figure S3.** Electrical conductivity experimental data ( $\kappa$ ) of EAN at 25 °C of the present work (black solid triangles) and a compilation of that published near water content studied ( $w$ ), with accurate measure of water content (solid) or not (open): [S3] (green dots), [S4] (yellow dots), [S10] (orange dots), [S14] (cyan dots), [S15] (red dots), [S21] (pink dots), [S38] (grey dots), [S56] (dark green dots), [S57] (brown dots), [S68] (blue dots) and [S69] (dark red dots).

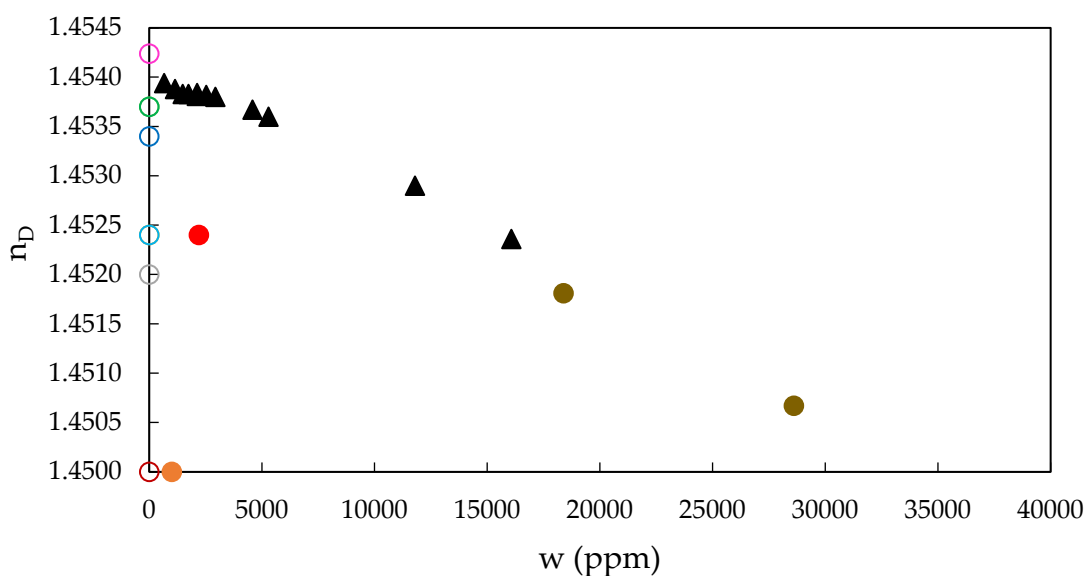

**Figure S4.** Refractive index experimental data ( $n_D$ ) of EAN at 25 °C of the present work (black solid triangles) and a compilation of that published near water content studied ( $w$ ), with accurate measure of water content (solid) or not (open): [S11] (green dots), [S15] (yellow dots), [S18] (orange dots), [S20] (cyan dots), [S21] (red dots), [S40] (pink dots), [S44] (grey dots), [S45] (dark green dots), [S50] (brown dots), [S51] (blue dots) and [S65] (dark red dots).

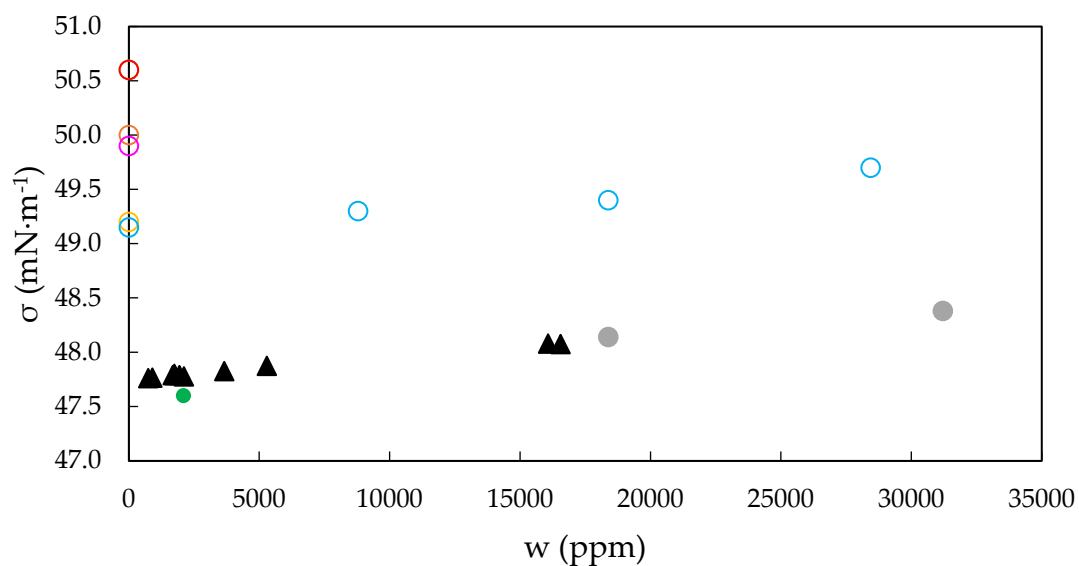

**Figure S5.** Surface tension experimental data ( $\sigma$ ) of EAN at 25 °C of the present work (black solid triangles) and a compilation of that published near water content studied ( $w$ ), with accurate measure of water content (solid) or not (open): [S10] (green dots), [S15] (yellow dots), [S17] (orange dots), [S26] (cyan dots), [S27] (red dots), [S48] (pink dots), [S50] (grey dots) and [S66] (dark green dots).

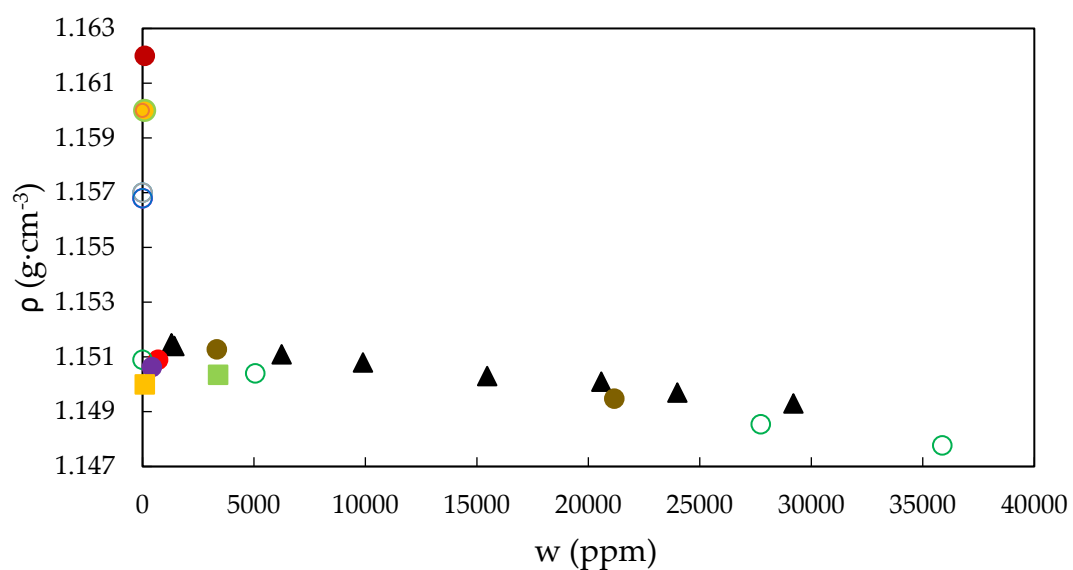

**Figure S6.** Density experimental data ( $\rho$ ) of PAN at 25 °C of the present work (black solid triangles) and a compilation of that published near water content studied ( $w$ ), with accurate measure of water content (solid) or not (open): [S5] (green dots), [S6] (yellow dots), [S7] (orange dots), [S11] (cyan dots), [S14] (red dots), [S44] (pink dots), [S45] (grey dots), [S46] (dark green dots), [S50] (brown dots), [S51] (blue dots), [S55] (dark red dots), [S57] (purple dots), [S61] (green squares) and [S62] (yellow squares).

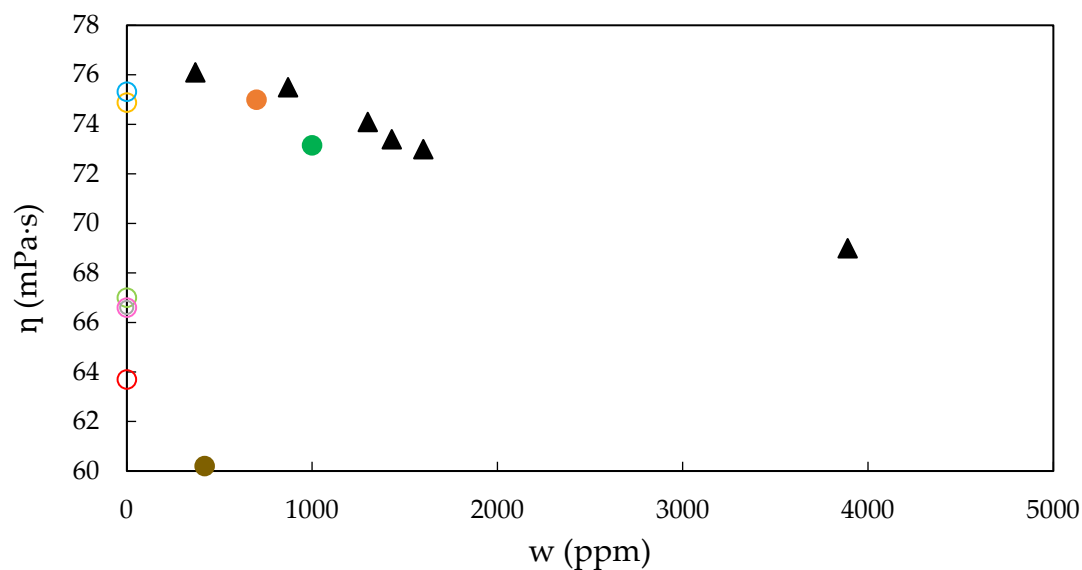

**Figure S7.** Viscosity experimental data ( $\eta$ ) of PAN at 25 °C of the present work (black solid triangles) and a compilation of that published near water content studied ( $w$ ), with accurate measure of water content (solid) or not (open): [S11] (green dots), [S13] (yellow dots), [S14] (orange dots), [S15] (cyan dots), [S44] (red dots), [S45] (pink dots), [S51] (grey dots), [S53] (dark green dots) and [S57] (brown dots).

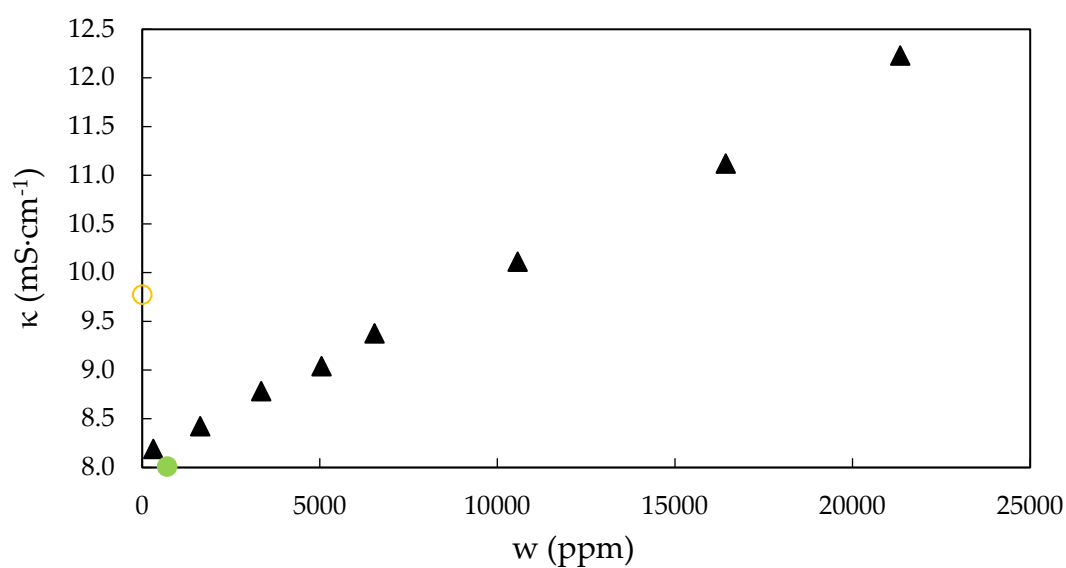

**Figure S8.** Electrical conductivity experimental data ( $\kappa$ ) of PAN at 25 °C of the present work (black solid triangles) and a compilation of that published near water content studied ( $w$ ), with accurate measure of water content (solid) or not (open): [S14] (green dots) and [S15] (yellow dots).

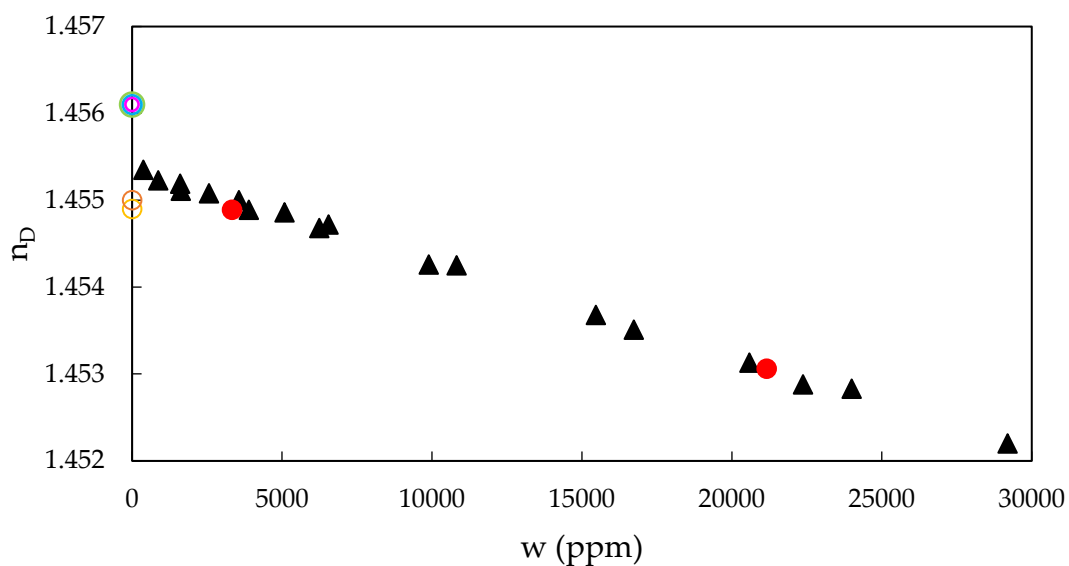

**Figure S9.** Refractive index experimental data ( $n_D$ ) of PAN at 25 °C of the present work (black solid triangles) and a compilation of that published near water content studied ( $w$ ), with accurate measure of water content (solid) or not (open): [S11] (green dots), [S15] (yellow dots), [S44] (orange dots), [S45] (cyan dots), [S50] (red dots) and [S51] (pink dots).

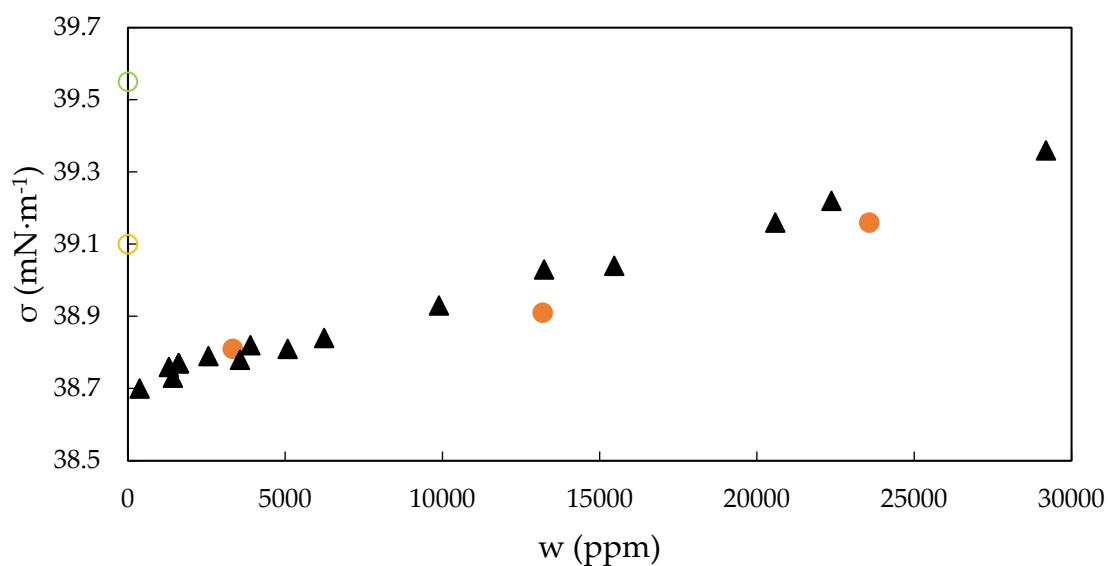

**Figure S10.** Surface tension experimental data ( $\sigma$ ) of PAN at 25 °C of the present work (black solid triangles) and a compilation of that published near water content studied ( $w$ ), with accurate measure of water content (solid) or not (open): [S15] (green dots), [S48] (yellow dots) and [S50] (orange dots).
